# Supplementary material for: Nanostructured Fe–Ag electrocatalysts for the oxygen reduction reaction in alkaline media
Source: Royal Society of Chemistry journal article supplement (doi:10.1039/c3ta12757e), 2013-01-01
Supplement: c3ta12757e.pdf [file c3ta12757e.pdf]

## Supporting Information:

# Nanostructured Fe-Ag electrocatalysts for the oxygen reduction reaction in alkaline media

H. A. Miller,<sup>a\*</sup> M. Bevilacqua,<sup>a</sup> J. Filippi,<sup>a</sup> A. Lavacchi,<sup>a</sup> A. Marchionni,<sup>a</sup> M. Marelli,<sup>c</sup> S. Moneti,<sup>a</sup>  
W. Oberhauser,<sup>a</sup> E. Vesselli,<sup>d,e</sup> M. Innocenti,<sup>a,b</sup> F. Vizza<sup>a\*</sup>

\* Istituto di Chimica dei Composti Organometallici Consiglio Nazionale delle Ricerche  
(ICCOM-CNR), via Madonna del Piano 10, 50019 Sesto Fiorentino (Italy)

<sup>[a]</sup> Istituto di Chimica dei Composti Organometallici Consiglio Nazionale delle Ricerche  
(ICCOM-CNR), via Madonna del Piano 10, 50019 Sesto Fiorentino, Italy

<sup>[b]</sup> Dipartimento di Chimica, Università di Firenze, via della Lastruccia 3, Sesto Fiorentino  
50019, Italy

<sup>[c]</sup> Istituto di Scienze e Tecnologie Molecolari (ISTM-CNR) via Camillo Golgi 19, 20133  
Milano

<sup>[d]</sup> Physics Department and CENMAT, University of Trieste, I-34127 Trieste, Italy

<sup>[e]</sup> IOM-CNR, Laboratorio TASC, AREA Science Park, S.S. 14 Km 163.5, 34149 Trieste, Italy

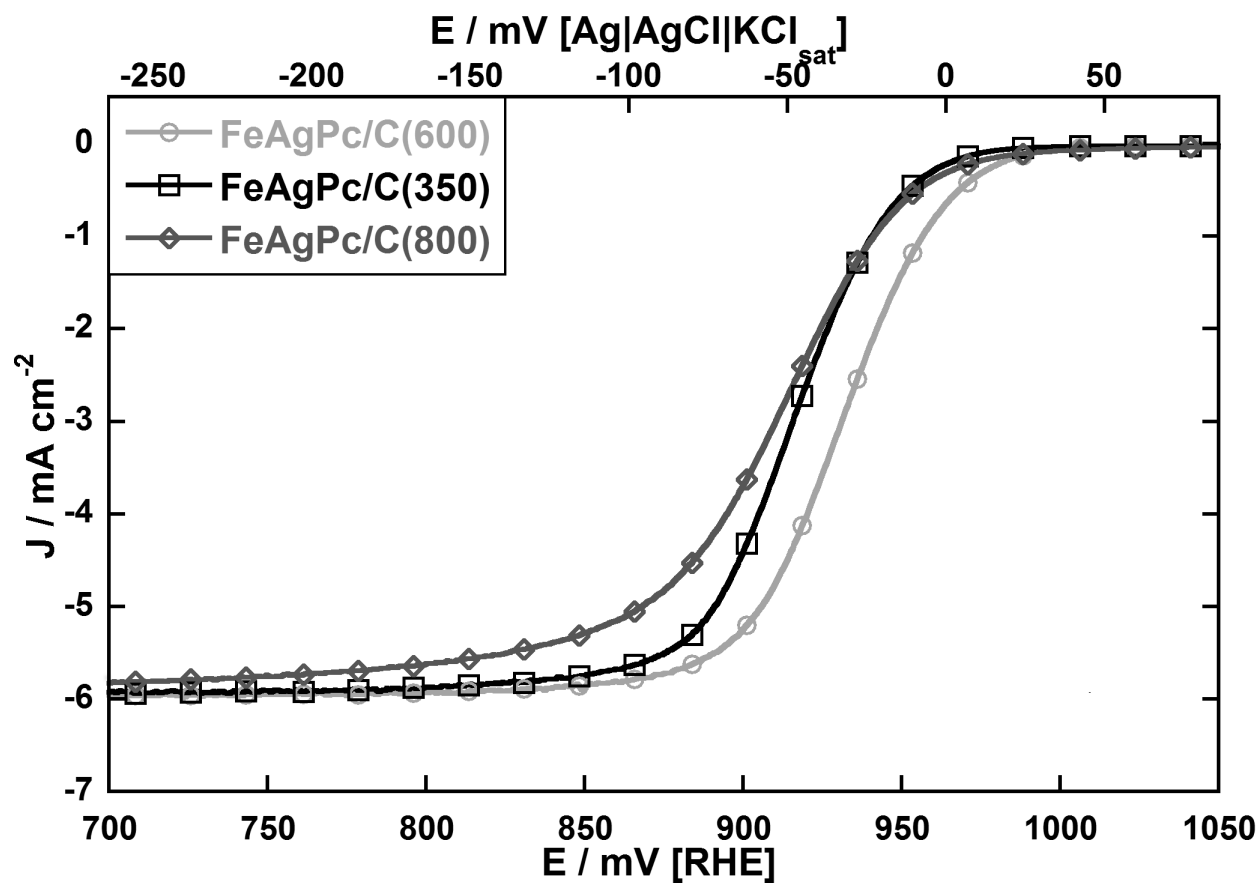

Fig. S1. Polarization curves for the ORR of FeAgPc/C(350), FeAgPc/C(600) and FeAgPc/C(800). Experimental conditions: KOH 0.1 M, O<sub>2</sub> saturated, RDE  $\Omega = 1600$  rpm, linear sweep voltammetry 5 mVs<sup>-1</sup>, ref. electrode AgCl|KCl<sub>sat</sub> (all potentials are referred to RHE).

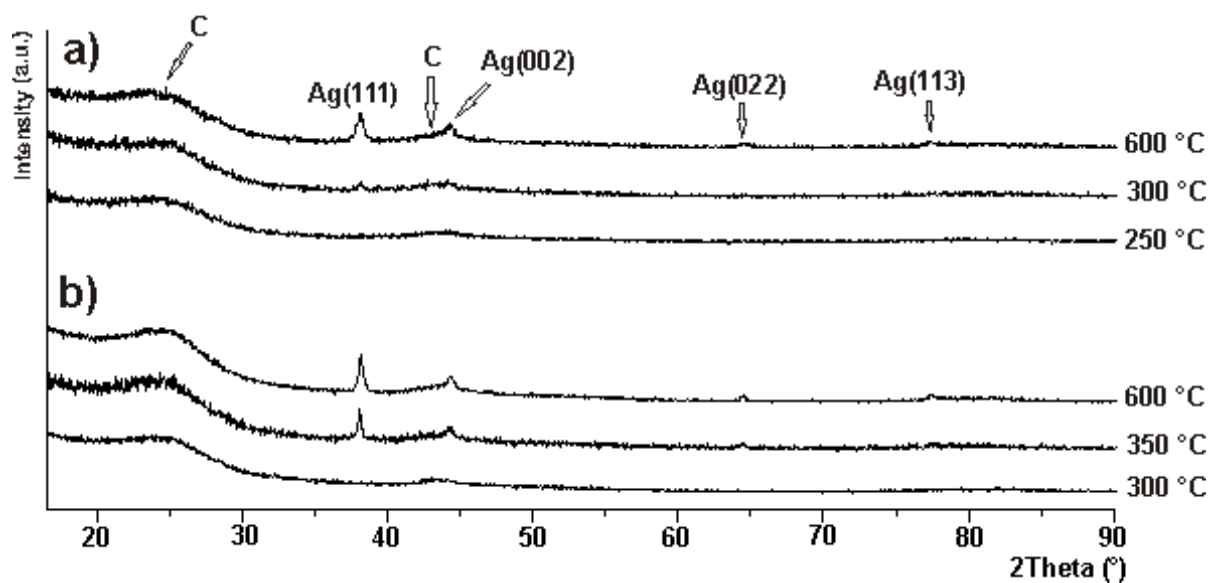

Fig. S2. XRPD traces acquired after heat treatment (2 h) of AgPc/C (a) and of FeAgPc/C (b) under Ar at different temperatures.

### S3. Synthesis of Ag/C (3 wt%):

An aqueous solution of  $\text{AgNO}_3$  (0.03 g in 20 mL) was added drop wise to a vigorously stirred suspension of 0.5 g of Ketjen Black in 100 mL of water. The pH was adjusted to 12 by the addition of KOH (1 M) and the mixture was stirred for 30 mins at room temperature. The resulting solid was collected by filtration, washed thoroughly with water until  $\text{pH} = 7$ , and dried to constant weight at 70 °C. This precursor was introduced into a quartz reactor and heated to 200 °C under a continuous flow of  $\text{H}_2$  for 2 h. After cooling to room temperature under continued  $\text{H}_2$  flow, the black powder was milled before use (rotary ball mill, 20 mins, 250 rpm). Yield 0.49 g, Analysis ICP-AES, Ag 3.1 wt%

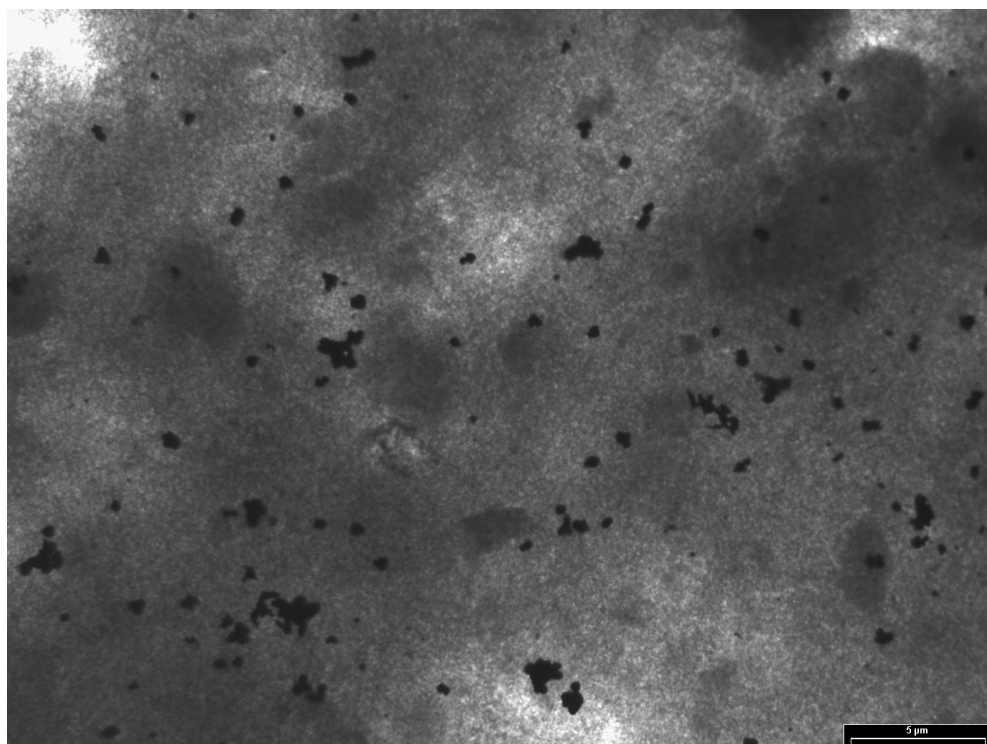

Fig. S3. TEM image of Ag/C (3.1 wt%), scale bar = 5  $\mu\text{m}$ .

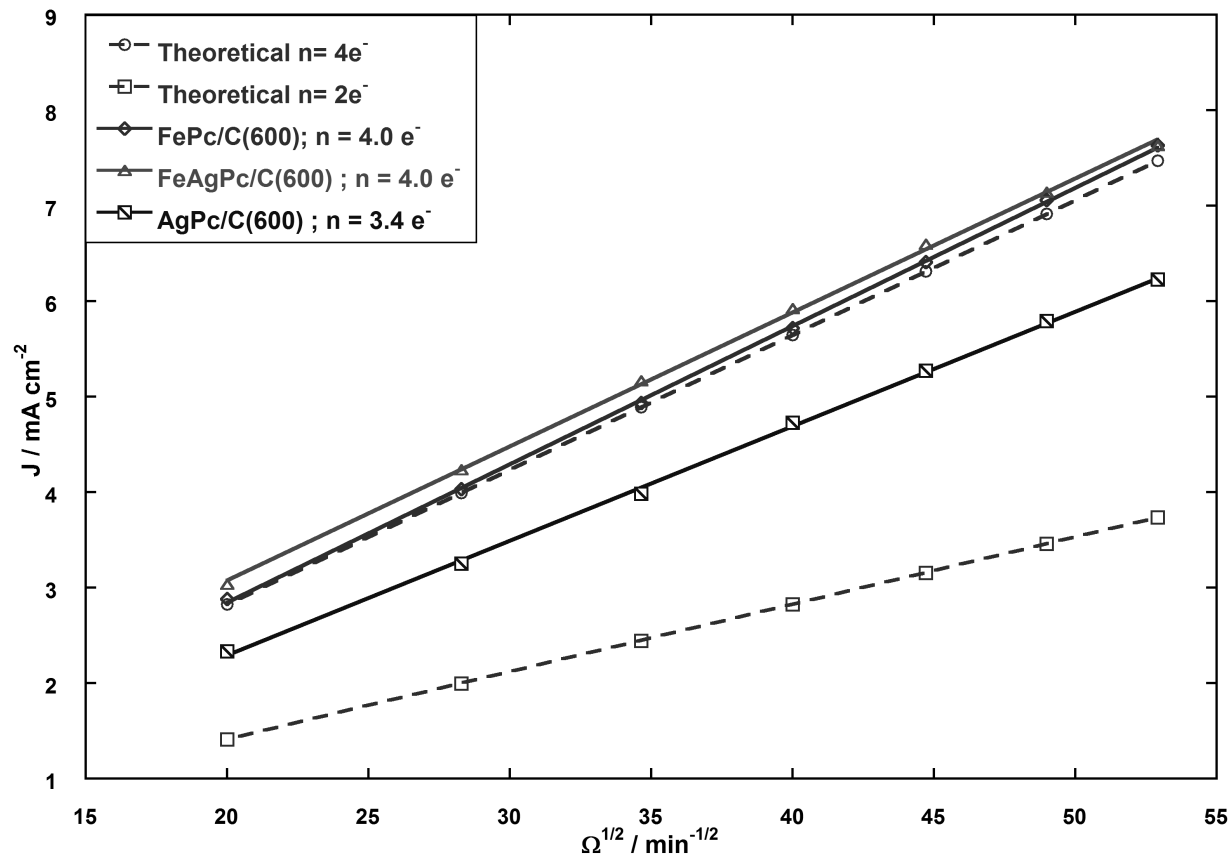

Fig. S4. Koutecky–Levich plots for FePc/C(600), AgPc/C(600) and FeAgPc/C(600).
